# Supplementary material
Source: MDPI journal article supplement (https://www.mdpi.com/2073-4441/16/4/538)
Supplement: s1 [file s1]

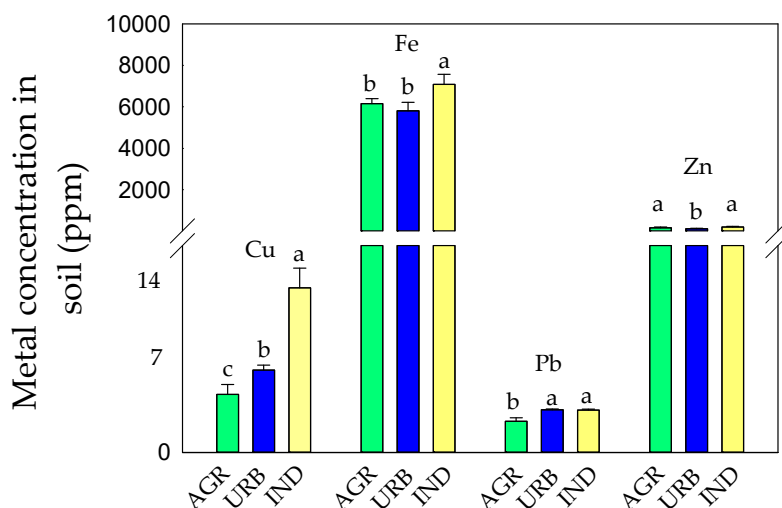

Figure S1. Total metal concentration (ppm) of Cu, Fe, Pb and Zn reported as mean  $\pm$  standard error in soil subjected to different land uses. Different letters show statistically significant differences (One-Way ANOVA,  $p \leq 0.05$ ).

Supplementary Table S1. Means of raw values  $\pm$  standard error for the bioaccumulation factors (BF) of heavy metals (Cu, Fe, Pb and Zn) from water (BFw) and soil (BFs) to toad for sites subjected to different land use (AGR, URB and IND).

|     | BFw        |            |            |            | BFs        |             |            |            |
|-----|------------|------------|------------|------------|------------|-------------|------------|------------|
|     | Cu         | Fe         | Pb         | Zn         | Cu         | Fe          | Pb         | Zn         |
| AGR | 0.95       | 1.61       | 0.63       | 1.09       | 0.11       | 0.08        | 0.25       | 0.12       |
|     | $\pm 0.09$ | $\pm 0.11$ | $\pm 0.10$ | $\pm 0.12$ | $\pm 0.01$ | $\pm 0.01$  | $\pm 0.01$ | $\pm 0.01$ |
| URB | 0.93       | 1.29       | 1.25       | 1.29       | 0.09       | 0.09        | 0.22       | 0.30       |
|     | $\pm 0.01$ | $\pm 0.09$ | $\pm 0.45$ | $\pm 0.01$ | $\pm 0.01$ | $\pm 0.01$  | $\pm 0.03$ | $\pm 0.01$ |
| IND | 1.07       | 2.12       | 0.94       | 1.26       | 0.06       | 0.01        | 0.28       | 0.10       |
|     | $\pm 0.19$ | $\pm 0.54$ | $\pm 0.04$ | $\pm 0.03$ | $\pm 0.01$ | $\pm 0.003$ | $\pm 0.05$ | $\pm 0.01$ |
